# Supplementary material
Source: publisher figshare collection journal article supplement (https://plos.figshare.com/articles/dataset/_/1636344)
Supplement: Supplementary file [file 1]

**S2 Table. Top ten differentially-expressed genes between the male and female libraries.**

| Unigene ID                                                                                              | Hit Number                      | Discription                                                                 | FDR       | Log2Ratio<br>(20-25dM<br>ale/20-25d<br>Female) |
|---------------------------------------------------------------------------------------------------------|---------------------------------|-----------------------------------------------------------------------------|-----------|------------------------------------------------|
| CL46.contig2 <sup>a</sup>                                                                               |                                 |                                                                             | 0         | 17.63                                          |
| Unigene10092 <sup>a</sup>                                                                               | gi 131093 sp P17502.1           | RecName: Full=Protamine                                                     | 0         | 17.02                                          |
| Unigene12361 <sup>a</sup>                                                                               |                                 |                                                                             | 0         | 16.72                                          |
| Unigene3713 <sup>a</sup>                                                                                |                                 |                                                                             | 0         | 16.53                                          |
| Unigene16134 <sup>a</sup>                                                                               |                                 |                                                                             | 5.09E-226 | 16.08                                          |
| Unigene15385 <sup>a</sup>                                                                               | gi 340729244 ref XP_003402916.1 | PREDICTED: trypsin-7-like [ <i>Bombus terrestris</i> ]                      | 0         | 15.57                                          |
| Unigene10584 <sup>a</sup>                                                                               |                                 |                                                                             | 2.71E-178 | 15.29                                          |
| Unigene13807 <sup>a</sup>                                                                               | gi 189235559 ref XP_968512.2    | similar to CG17377 CG17377-PA [ <i>Tribolium castaneum</i> ]                | 0         | 15.15                                          |
| CL2694.contig<br>1 <sup>a</sup>                                                                         | gi 307168676 gb EFN61712.1      | Trypsin-1 [ <i>Camponotus floridanus</i> ]                                  | 0         | 14.95                                          |
| Unigene6261 <sup>a</sup>                                                                                |                                 |                                                                             | 1.82E-193 | 14.93                                          |
| Unigene2879 <sup>b</sup>                                                                                |                                 |                                                                             | 0         | -16.73                                         |
| Unigene9815 <sup>b</sup>                                                                                |                                 |                                                                             | 1.86E-163 | -14.72                                         |
| Unigene2890 <sup>b</sup>                                                                                |                                 |                                                                             | 0         | -14.71                                         |
| Unigene11733 <sup>b</sup>                                                                               |                                 |                                                                             | 2.91E-263 | -14.55                                         |
| CL235.contig3 <sup>b</sup>                                                                              | gi 263191198 ref NP_001161084.1 | chymotrypsin-like proteinase 6D precursor<br>[ <i>Tribolium castaneum</i> ] | 1.27E-212 | -14.16                                         |
| Unigene3672 <sup>b</sup>                                                                                | gi 186396 gb AAA59163.1         | mucin, partial [ <i>Homo sapiens</i> ]                                      | 6.11E-174 | -14.12                                         |
| Unigene3792 <sup>b</sup>                                                                                | gi 325459340 gb ADZ13687.1      | secretory eggshell protein precursor [ <i>Clonorchis sinensis</i> ]         | 2.78E-153 | -13.40                                         |
| Unigene6643 <sup>b</sup>                                                                                | gi 471403978 ref XP_004384164.1 | PREDICTED: protein PRRC2C [ <i>Trichechus manatus latirostris</i> ]         | 2.05E-100 | -13.19                                         |
| Unigene10980 <sup>b</sup>                                                                               |                                 |                                                                             | 5.21E-146 | -13.17                                         |
| CL2856.contig<br>1 <sup>b</sup>                                                                         | gi 289191335 ref NP_001166054.1 | serine protease 120 precursor [ <i>Nasonia vitripennis</i> ]                | 1.73E-95  | -13.17                                         |
| The corner marks of gene ID: ‘a’ represents up-regulated genes and ‘b’ represents down-regulated genes. |                                 |                                                                             |           |                                                |
