# Supplementary material
Source: publisher figshare collection journal article supplement (https://plos.figshare.com/articles/dataset/_/1636344)
Supplement: Supplementary file [file 1]

**S1 Table.** Primers used for RT-qPCR analysis

| Gene           | Primer sequences (forward and reverse)                    |
|----------------|-----------------------------------------------------------|
| <i>RPL22e</i>  | 5'-AGGCTTGAAGAAGAAGAAG-3'<br>5'-ATGTTGGCTGGATTACC-3'      |
| <i>UBE3A</i>   | 5'-TTAGTGAATGCTCTAGTAAC-3'<br>5'-CGGTAATGCTGTCTCTAA-3'    |
| <i>atoB1</i>   | 5'-TGAAGGATGGCTTGACAGAC-3'<br>5'-GTGCGAATGGCATAATCATC-3'  |
| <i>atoB2</i>   | 5'-AACTCCCGGTAATGCATCTG-3'<br>5'-GCCAACGGTTTGAGATTCTT-3'  |
| <i>HMGS</i>    | 5'-AACCGATAAGGACGTTACGC-3'<br>5'-GAAGCCCATCTTCTCCTGTC-3'  |
| <i>HMGR</i>    | 5'-GAAGGTCGTGGTAAATCGGT-3'<br>5'-GCAACAGCTGAACCAATCAT-3'  |
| <i>IDI</i>     | 5'-GCGAGGATAACGAGGAGAAC-3'<br>5'-GCCATTCCCTTCGTCTTTAT-3'  |
| <i>FPPS</i>    | 5'-AAGCCCGAATTACACGAAAC-3'<br>5'-TCGATGCGATATTTGGTGAT-3'  |
| <i>STE24</i>   | 5'-CCACACAATTGAATTTCCCA-3'<br>5'-CCACACAAATAGGCGTTACTG-3' |
| <i>CYP15A1</i> | 5'-GGCGACTTGTGGTCTATTCA-3'<br>5'-CTTCACCATCAATTCCATCG-3'  |
| <i>JHEH</i>    | 5'-CGAACATGTGTTATGCGACA-3'<br>5'-CAAGAAGACGATTGGCGTAA-3'  |
| <i>JHE</i>     | 5'-GCAATTTGAGCGGTCTAACA-3'<br>5'-ATTGAAACGACTCACCCACA-3'  |
| <i>aceE</i>    | 5'-ATGAAACGGCACAAATTGAA-3'<br>5'-ACCGTGCTTGAAATTCCTTC-3'  |
| <i>alaS</i>    | 5'-GGAAGTTGTAGGGACCGATG-3'<br>5'-TTCGTCAACAAATTCCAAGC-3'  |
| <i>ATPeVIE</i> | 5'-CGTATCACCCAAATGATTGC-3'<br>5'-AAACGTTCCTCTTGGCAAAT-3'  |
